# Supplementary material for: Crystalline metallic Au nanoparticle-loaded α-Bi2O3 microrods for improved photocatalysis
Source: Royal Society of Chemistry journal article supplement (doi:10.1039/c2cp42165h), 2012-01-01
Supplement: c2cp42165h.pdf [file c2cp42165h.pdf]

Supporting Materials for:

**Crystalline metallic Au nanoparticle-loaded  $\alpha$ - $\text{Bi}_2\text{O}_3$  microrods for improved photocatalysis<sup>†</sup>**

**Hai-Ying Jiang, Kun Cheng and Jun Lin\***

*Department of Chemistry, Renmin University of China, Beijing 100872, People's Republic of China*

**Corresponding Author**

\*E-mail: [jlin@chem.ruc.edu.cn](mailto:jlin@chem.ruc.edu.cn); Tel: +86-10-62514133; Fax: +86-10-62516444.

<sup>†</sup> Electronic supplementary information (ESI) available: See DOI:

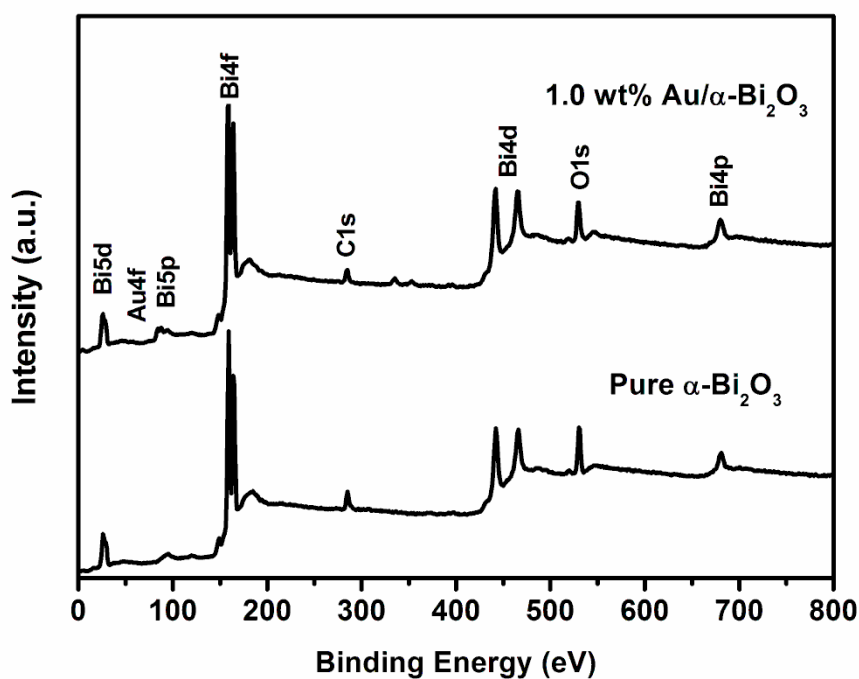

**Fig. 1S** XPS survey spectra for the surface of pure  $\alpha$ - $\text{Bi}_2\text{O}_3$  and 1.0 wt% Au/ $\alpha$ - $\text{Bi}_2\text{O}_3$ .
